## RESEARCH ARTICLE

# Modified therapy concepts for fragility fractures of the pelvis after additional MRI

Isabel Graul<sup>1\*</sup>, Ivan Marintshev<sup>1</sup>, Carsten Hackenbroch<sup>2</sup>, Hans-Georg Palm<sup>3</sup>, Benedikt Friemert<sup>4</sup>, Patricia Lang<sup>4</sup>

**1** Department of Trauma-, Hand- and Reconstructive Surgery, University Hospital Jena, Jena, Germany, **2** Department of Radiology and Neuroradiology, Ulm Army Hospital, Ulm, Germany, **3** Department of Orthopaedic and Trauma Surgery, Universitätsklinikum Erlangen, Erlangen, Germany, **4** Department of Trauma Surgery and Orthopaedics, Reconstructive and Septic Surgery, Sports Traumatology, Ulm Army Hospital, Ulm, Germany

\* [Isabel.graul@med.uni-jena.de](mailto:Isabel.graul@med.uni-jena.de)

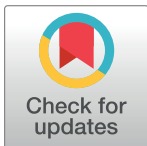

## Abstract

### Background

Fractures of the pelvic ring in elderly patients have increased in frequency over time. These injuries are associated with a high morbidity and have a socio-economic impact. The diagnostic procedures and their influence of therapy decisions are still controversial.

### Methods

In a retrospective study, we investigate the value of additional MRI examination on therapy decision of fragility fractures of the pelvis. The evaluation of all patients with pelvic fractures without adequate trauma and with performed CT and MRI was conducted at three large German hospitals. The imaging procedure took place within a maximum interval of 4 weeks. After evaluation of the imaging, the resulting therapeutic consequences either based on CT alone or on CT and MRI were reviewed by experienced pelvic surgeons.

### Results

Of 754 patients with pelvic injuries, 67 (age 80 +/- 9.7 years, f: m 54:13) could be included. The detection of vertical fractures in CT (n = 40 unilateral, n = 11 bilateral) could be increased by the additional MRI (n = 44 unilateral, n = 23 bilateral). A horizontal fracture component was identified in CT in 9.0% (n = 6) vs. MRI in 25.4% (n = 17) of the cases. An anterior pelvic ring injury was detected in 71.6% (n = 44; 4x bilateral) in CT, in 80.6% in MRI (n = 50, 4 bilateral). Additive MRI imaging increased the decision rate for surgical therapy from 20.9% (n = 14) to 31.3% (n = 21).

### Conclusions

The results of this study further support the value of bone marrow edema detection by MRI diagnostics (or dual source CT which showed promising initial results) for the detection of pelvic ring fractures. For the first time, the study identifies an additional therapeutic consequence by an increased rate of surgical procedures.

## OPEN ACCESS

**Citation:** Graul I, Marintshev I, Hackenbroch C, Palm H-G, Friemert B, Lang P (2020) Modified therapy concepts for fragility fractures of the pelvis after additional MRI. PLoS ONE 15(10): e0238773. <https://doi.org/10.1371/journal.pone.0238773>

**Editor:** Hans-Peter Simmen, University Hospital Zurich, SWITZERLAND

**Received:** June 17, 2020

**Accepted:** August 24, 2020

**Published:** October 8, 2020

**Copyright:** © 2020 Graul et al. This is an open access article distributed under the terms of the [Creative Commons Attribution License](https://creativecommons.org/licenses/by/4.0/), which permits unrestricted use, distribution, and reproduction in any medium, provided the original author and source are credited.

**Data Availability Statement:** All relevant data are within the manuscript file.

**Funding:** The authors received no specific funding for this work.

**Competing interests:** The authors have declared that no competing interests exist.

## Introduction

Due to the demographic development of an ageing population, the number of pelvic fractures in the elderly is increasing [1–3]. Through improved diagnostic possibilities, so-called insufficiency fractures of the pelvic ring (Fragility Fractures of the Pelvis, FFP) are diagnosed in patients without adequate or memorable trauma. The Availability of different diagnostic decision algorithms and associated therapies are often a challenge for the treating physician.

Older patients usually present with a minor trauma that is not remembered or that often occurred weeks ago. The leading symptoms are lumbosacral pain and immobility, but not neurological deficits or concomitant injuries. This requires a certain amount of experience in clinical and radiological diagnostics in order to attach adequate importance to the unspecific clinical picture and to initiate further diagnostics. Conventional x-rays often show no pathological findings or only a fracture of the pubic bone. The sensitivity of X-rays for the detection of a posterior pelvic ring injury is only 15–35% [4]. Further imaging is necessary. CT as a widely available, cost-effective and quickly available imaging is in the foreground with a detection rate of 53–75% [5]. MRI is available with a higher identification rate of bone edema 98–100% [6, 7]. MRI is more cost-intensive, limited and time-delayed. Nüchtern et al. described in a patient collective (n = 60) a detection rate of the posterior pelvic ring fracture in CT of 71%. This was 99% in the MRI. In the CT examination the posterior pelvic ring fracture was overlooked in 17% (n = 8) [8]. Similar results were shown in the study by Henes et al. (n = 38) with a detection rate of sacral fractures in CT of 66% and in MRI of 99%. These studies included patients with trauma who had an anterior pelvic ring fracture in x-ray [9]. Insufficiency fractures, however, were not included. The study by Pulley et al. retrospectively investigated the frequency of pelvic fractures in patients older than 50 years and low-energy traumas. He found a frequency of 16.7% (n = 19/114). Pulley diagnosed the fractures in CT and an MRI was supplemented only in some cases [10]. Insufficiency fractures were not detected. As far as the detection of FFP is concerned, there is only one study with two-digit case numbers by Cabarrus et al. which directly compares MRI and CT. Insufficiency fractures of the sacrum were detected in MRI in 100% (n = 67) and in CT in 75% of the cases. In the area of the anterior pelvic ring he showed a detection rate of 100% in MRI and 65.5% in CT. As a result, he recommends MRI as the diagnostic standard [6]. However, a common consensus has not yet been reached.

A new option, dual-energy CT (using the so-called virtual non-calcium technique) is derived from this.

According to WHO, the measurement of bone mineral density (BMD) using Dual Energy X-ray Absorptiometry (DEXA) is the method of choice [11]. Quantitative computed tomography (QTC) is another option, but has lost importance due to radiation exposure. There are already studies that have dealt with the screening of osteoporosis by determining bone density using conventional CT examination ("opportunistic osteoporosis diagnosis") [12]. This involves ROI measurement of the Hounsfield Units (HU), within the vertebral spongiosa in a normally configured vertebral body, preferably lumbar. There are already initial results showing a statistically significant correlation between the T-score from the DEXA measurement and the bone density measurement using CT [12]. It is not yet clear whether the HUs recorded in L5, for example, correlate with the severity of the insufficiency fracture. In severely injured patients with adequate pelvic trauma, diagnosis is clearly defined by the S3 guideline poly-trauma [13]. In contrast, the diagnostic procedure for insufficiency fractures has not yet been conclusively clarified: An equivalent priority of MRI and Dual Energy CT (DECT) is described [7, 14, 15].

The aim of our retrospective multicenter study is therefore to analyse the sequence of the diagnostics performed on patients with suspected FFP and to outline the consequences of additional MRI imaging. The primary objectives are on the one hand to determine whether the additional MRI examination leads to a change in the CT-based FFP classification according to Rommens and on the other hand whether the additional MRI examination entails a modification of the therapy (conservative vs. surgical or change in the surgical procedure).

The Hounsfield units in L 5 as an indicator of reduced bone density were recorded as a secondary target.

## Patients and methods

### Patients

Three German hospitals with specialized trauma care and membership in the Pelvic Injury Register of the German Trauma Society participated in the retrospective multicenter study.

All patients were included with unremarkable or inadequate trauma and resulting FFP and received both MRI and conventional CT with a maximum interval of 4 weeks to analyse fracture morphology in both imaging techniques from 2010 to 2017 (Fig 1). Since bone marrow edema changes persist for a very long time (over weeks) source, a period of 4 weeks was tolerated. All patients with FFP and incomplete diagnosis or extended period (>4 weeks) until diagnosis from CT and MRI or with adequate trauma anamnesis such as high energy injury were excluded.

Patients with FFP fractures were recorded for a period of seven years via internal clinical databases. In addition, all patients who did not meet the inclusion criteria were excluded. The fractures were classified in CT diagnostics according to the FFP classification of Rommens and Hofmann [16]. From this classification, a therapeutic regime can be derived that enables rapid

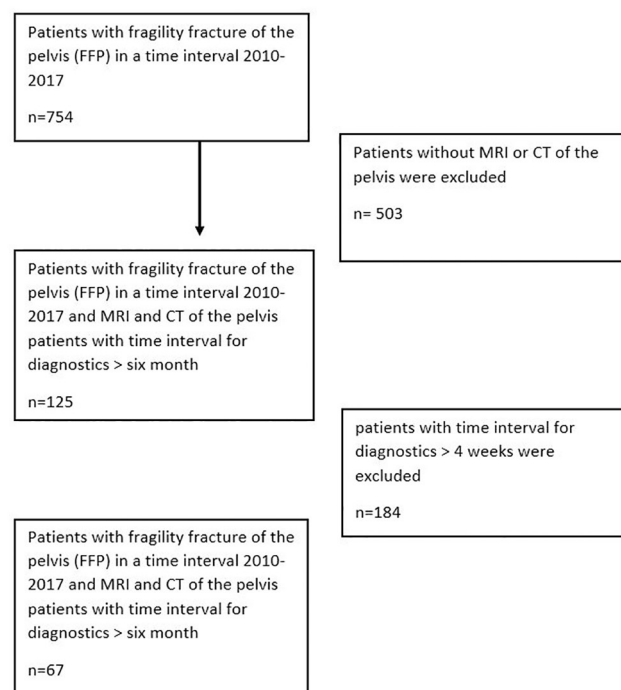

**Fig 1. Schematic flow chart of the patient selection process.**

<https://doi.org/10.1371/journal.pone.0238773.g001>

**Table 1. Overview of the fracture location and therapeutic regime recommended by Rommens et al. [16].**

| FFP type I                                                                | FFP type II                                                                                                      | FFP type III                                                           | FFP type IV                                                            |
|---------------------------------------------------------------------------|------------------------------------------------------------------------------------------------------------------|------------------------------------------------------------------------|------------------------------------------------------------------------|
| anterior pelvic ring fracture                                             | undislocated anterior and posterior pelvic fracture                                                              | dislocated anterior and posterior pelvic fracture                      | both sided anterior and posterior pelvic fracture                      |
| conservative                                                              | conservative try, if necessary operative                                                                         | operative                                                              | operative                                                              |
| mobilization with pain-adapted full load, analgesia, osteoporosis therapy | conservative (see FFP I), in case of failure e.g. percutaneous screw osteosynthesis of the posterior pelvic ring | reduction and osteosynthesis of the anterior and posterior pelvic ring | reduction and osteosynthesis of the anterior and posterior pelvic ring |

<https://doi.org/10.1371/journal.pone.0238773.t001>

and painless remobilization and reduces immobilization-associated risks (e.g. pneumonia, thromboembolism, skin ulcerations) presented in Table 1 [16].

In the MRI diagnostics, the bone marrow edema was documented in regions defined by us (Ala, S1 vertebral body, S2 vertebral body, anterior pelvic ring). Furthermore, a measurement of the Hounsfield units was recorded in L 5 as an indicator of reduced bone density [12, 17]. Subsequently, the respective data sets were presented to three experienced pelvic surgeons (at least 10 years of professional experience with a focus on pelvic fractures) with the question whether and how they would classify the fracture according to FFP and how they would change the therapy decision by the additional information from the MRI examination. The change in therapy was defined as a change if at least to surgeons decided from conservative to surgical or in the type of surgical procedure.

In addition, patient-specific data such as "age", "sex", "underlying diseases", trauma history and "concomitant injuries" as well as inpatient treatment data such as length of stay and interval between CT and MRI are to be recorded and analysed. The parameters for each patient were listed using the Excel program (Microsoft Office 2016).

CT diagnosis was used as native CT of the pelvis in case of insufficiency fractures. Reconstruction was performed in the bone and soft tissue windows with sagittal and coronary reformations (multiplanar reconstructions (MPR)). Since each clinic uses different CT devices, there is no uniformity, the layer thickness was 1–5 mm. Different scanners were also used for MRI diagnostics, so that there is no uniform standard protocol. Edema expansion was assessed using fluid-sensitive fat-saturated sequences T2w or PDw sequences (Short-Tau Inversion Recovery (STIR)/ Turbo-Inversion Recovery-Magnitude (TIRM), Protone Densitiy weighted (PDw), Fat Saturation (fatsat)) and partially complementary T1w and T2w sequences.

In retrospective data evaluation, patients received an MRI if they complained of pain in the pelvic region, which could not be appropriately explained by CT imaging (no fracture detection and persistent pain). In patients who were seen to have a fracture in CT, MRI diagnosis was only performed if the fracture did not correspond to the symptoms. There are no internal clinical guidelines for the decision on MRI imaging. The procedure depends on the criteria mentioned above.

Statistical analysis was performed with SPSS V24.0 (IBM, Armonk, USA). Descriptive statistics were used for the basic variables. For continuous variables mean values and standard deviations (SD) were calculated. Fracture capture rates for CT and MRI were calculated using the previously described standard. Sensitivities were computed as a percentage of patients in whom at least one of the three techniques detected a fracture. To compare the groups, the two-sided student t-test for continuous variables and the Chi-square test and Fisher's exact test for categorical variables were used. For the correlation of FFP classification to HU the Spearman-test was used. Results were considered statistically significant if at the corresponding p-value was < 0.05. The significance tests of CT and MRI sensitivities were calculated using the McNemar test. The study obtained approval by the Ethics Commission of the University of Jena

(application number 2019–1380) and Ulm (application number 250/19) as well as registration in the German Register of Clinical Trials (DRKS; number DRKS00012440). Advice on data protection law has taken place.

## Results

Included were 67 patients (80+/-9.7 years, f:m 54:13) of the years 2010 to 2017 out of a total of 754 patients (88.9%). The time interval between CT and MRI of the pelvis was on average 4 days (range 1–21). The total hospital stay was 13 +/- 7.4 days. 31.3% (21/67) of the patients underwent surgical treatment. The hospital stay of the surgical group was significantly longer: 18 (+/-6.4) days vs. 10 (+/-6.4) days ( $p < 0.01$ ).

Dividing the underlying diseases into large groups with diseases of the blood vessels, heart, lungs, kidneys, musculoskeletal system (rheumatoid arthritis, chronic lumbar syndrome, etc.), malignancies, osteoporosis and endocrine diseases, resulted in 13% showing no relevant underlying diseases. On average, the patient suffered from 1.8 diseases (range 0–6) (Table 2). In 31.3% (21/67) of the patients no trauma anamnesis could be recorded, in 69.7% (46/67) a low-energy trauma usually consisted of a trip or fall from a sitting position. In 82.1% (55/67) the pelvic insufficiency fracture was a mono injury. Eleven patients had multiple injuries and showed 13 fractures, 1.2 fractures per patient (range 1–2) sorted by frequency: 6.0% (4/67) vertebral body fractures (1x L2, 1x L2 and L3, 1x T10, L1 and L2 and 1x L3), 4.5% (3/67) rib fractures, 3.0% (2/67) radius fractures, 3.0% (2/67) humeral fractures, 3.0% (2/67) acetabular fractures.

Of the 67 patients, 4.5% ( $n = 3$ ) showed no fracture, 19.4% ( $n = 13$ ) FFP I, 50.7% ( $n = 34$ ) FFP II, 9.0% ( $n = 6$ ) FFP III, and 16.4% ( $n = 11$ ) an FFP IV in CT and in MRI 7.5% ( $n = 5$ ) an FFP I, 52.2% ( $n = 35$ ) an FFP II, 3.0% ( $n = 2$ ) an FFP III and 37.3% ( $n = 25$ ) an FFP IV.

In the CT of the sacrum, 62 vertical fractures have been detected in 67 patients, of which 11 were bilateral fractures. The MRI of the sacrum revealed 90 vertical fractures, 23 of which were bilateral fractures. One transverse component was demarcated in CT in 9.0% ( $n = 6$ ) vs. MRI in 25.4% ( $n = 17$ ) of cases.

The anterior pelvic ring was fractured in CT 71.6% ( $n = 44$ ; 4x bilateral), in MRI 80.6% ( $n = 50$ , 4x bilateral).

A fracture of the transverse process of L5 was shown in 9.0% ( $n = 6/67$ ) in the radiological images.

In summary, 72.7% ( $n = 120/165$ ) of the pelvic ring fracture components could be detected in the CT of the pelvis compared to the MRI of the pelvis, and all fractures could be detected in the MRI.

19.4% ( $n = 13$ ) of the patients with posterior pelvic ring fractures showed no simultaneous involvement of the anterior pelvic ring in CT or MRI. 36.4% of the sacral fractures showed an additional fracture component (vertical or horizontal fracture) in the MRI compared to the CT examination. (Fig 2).

Based on the classification of Rommens and Hofmann [16], the CT-based distribution shown in Table 3 was obtained.

**Table 2. Basic disease of the patients divided in vascular, cardiac disease, diabetes, malignome, nephrological, neurological and pulmonal disease, osteoporosis, musculoskeletal disease and no basic disease.**

| basic disease      | vascular | cardial | diabetes | malignome | nephrological | neurological | pulmonal | osteoporosis | musculoskeletal | none |
|--------------------|----------|---------|----------|-----------|---------------|--------------|----------|--------------|-----------------|------|
| amount of patients | 38       | 20      | 6        | 11        | 5             | 14           | 8        | 14           | 9               | 9    |

<https://doi.org/10.1371/journal.pone.0238773.t002>

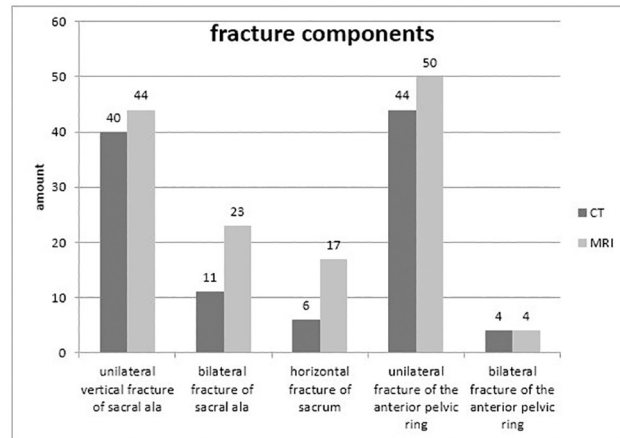

**Fig 2. Distribution of the fracture location findings comparing CT with MRI: From left to right: Vertical unilateral fractures (40 vs. 44 patients), vertical bilateral fractures (11 vs. 23 patients), and horizontal fractures (6 vs. 17 patients), unilateral fracture of the anterior pelvic ring (44 vs. 50 patients) and bilateral fracture of the pelvic ring (4 vs. 4 patients).**

<https://doi.org/10.1371/journal.pone.0238773.g002>

The evaluation of the imaging diagnostics by an experienced pelvic surgeon without consideration of the clinical aspects was divided into the decision categories: Operative therapy with stabilization of the sacrum, operative therapy with lumbopelvic stabilization and conservative therapy.

Based on the isolated CT findings, 79.1% ( $n = 53/67$ ) would have been treated with conservative therapy, 20.9% ( $n = 14/67$ ) with surgical stabilization. Surgical stabilization ( $n = 14$ ) was followed in 42.9% ( $n = 6/14$ ) by isolated stabilization of the sacrum and in 57.1% ( $n = 8/14$ ) by lumbopelvic stabilization.

Because of the combined CT and MRI findings 68.7% ( $n = 46/67$ ) were subjected to conservative therapy, 31.3% ( $n = 21$ ) to surgical stabilization. Surgical stabilization consisted of 42.9% ( $n = 9/21$ ) sacral stabilization and 57.1% ( $n = 12/21$ ) lumbopelvic stabilization.

Basing on additional MRI, changes in the treatment decision was evaluated in 10% ( $n = 7/67$ ): In 6 cases, a change was made from conservative to surgical treatment and in one case from isolated stabilization of the sacrum to lumbopelvic stabilization. In the 6 cases with initial conservative treatment, there were two patients with FFP I in CT and four FFP II upgrading to FFP IV in MRI and following this, the operative way was aimed at. One case was an FFP III in CT upgrading to FFP IV in MRI and following this, the decision for lumbopelvic stabilization instead of isolated sacral stabilization was evaluated.

The Hounsfield units in L 5 were  $62.7 \pm 33.7$  HU. 10% of the patients showed values  $> 100$  HU and therefore no clear bone density reduction in L 5.

A correlation of the Hounsfield units to the individual fracture classes FFP I-IV after Rommens could not be established. FFP IV fractures showed no lower bone density than FFP I, II or III. (Fig 3).

An anti-osteoporotic therapy was already taken at least as a basic therapy with calcium and vitamin D in 35.8% ( $n = 24/67$ ). 64.2% ( $n = 43/67$ ) did not receive anti-osteoporotic therapy.

## Discussion

The aim of the present study was to analyse the diagnostic procedure for 67 insufficiency fractures of the pelvis in a retrospective multicenter design and to derive a possible algorithm for diagnosis and therapy. Furthermore, a possible change of the FFP classification by the MRI

**Table 3. Distribution of all patients according to the fragility fracture of the pelvis classification according to Rommens comparing CT and MRI: No fracture in CT in 3 patients, FFP I (13 vs. 5 patients), FFP II (34 vs. 35 patients), FFP III (6 vs. 2 patients) and FFP IV (11 vs. 25 patients).**

| patient number | FFP in CT | therapy in CT | FFP in MRI | FFP change | therapy in CT and MRI | therapy change |
|----------------|-----------|---------------|------------|------------|-----------------------|----------------|
| 1              | 0         | conservative  | II         | yes        | conservative          | no             |
| 2              | 0         | conservative  | II         | yes        | conservative          | no             |
| 3              | 0         | conservative  | IV         | yes        | operative             | yes            |
| 4              | I         | conservative  | I          | no         | conservative          | no             |
| 5              | I         | conservative  | I          | no         | conservative          | no             |
| 6              | I         | conservative  | I          | no         | conservative          | no             |
| 7              | I         | conservative  | I          | no         | conservative          | no             |
| 8              | I         | conservative  | I          | no         | conservative          | no             |
| 9              | I         | conservative  | II         | yes        | conservative          | no             |
| 10             | I         | conservative  | II         | yes        | conservative          | no             |
| 11             | I         | conservative  | II         | yes        | conservative          | no             |
| 12             | I         | conservative  | II         | yes        | conservative          | no             |
| 13             | I         | conservative  | III        | yes        | operative             | yes            |
| 14             | I         | conservative  | IV         | yes        | conservative          | no             |
| 15             | I         | conservative  | IV         | yes        | conservative          | no             |
| 16             | I         | conservative  | IV         | yes        | operative             | yes            |
| 17             | II        | conservative  | II         | no         | conservative          | no             |
| 18             | II        | conservative  | II         | no         | conservative          | no             |
| 19             | II        | conservative  | II         | no         | conservative          | no             |
| 20             | II        | conservative  | II         | no         | conservative          | no             |
| 21             | II        | conservative  | II         | no         | conservative          | no             |
| 22             | II        | conservative  | II         | no         | conservative          | no             |
| 23             | II        | conservative  | II         | no         | conservative          | no             |
| 24             | II        | conservative  | II         | no         | conservative          | no             |
| 25             | II        | conservative  | II         | no         | conservative          | no             |
| 26             | II        | conservative  | II         | no         | conservative          | no             |
| 27             | II        | conservative  | II         | no         | conservative          | no             |
| 28             | II        | conservative  | II         | no         | conservative          | no             |
| 29             | II        | conservative  | II         | no         | conservative          | no             |
| 30             | II        | conservative  | II         | no         | conservative          | no             |
| 31             | II        | conservative  | II         | no         | conservative          | no             |
| 32             | II        | conservative  | II         | no         | conservative          | no             |
| 33             | II        | conservative  | II         | no         | conservative          | no             |
| 34             | II        | conservative  | II         | no         | conservative          | no             |
| 35             | II        | conservative  | II         | no         | conservative          | no             |
| 36             | II        | conservative  | II         | no         | conservative          | no             |
| 37             | II        | conservative  | II         | no         | conservative          | no             |
| 38             | II        | conservative  | II         | no         | conservative          | no             |
| 39             | II        | conservative  | II         | no         | conservative          | no             |
| 40             | II        | conservative  | II         | no         | conservative          | no             |
| 41             | II        | conservative  | II         | no         | conservative          | no             |
| 42             | II        | conservative  | II         | no         | conservative          | no             |
| 43             | II        | conservative  | II         | no         | conservative          | no             |
| 44             | II        | conservative  | II         | no         | conservative          | no             |
| 45             | II        | conservative  | II         | no         | conservative          | no             |
| 46             | II        | conservative  | IV         | yes        | conservative          | no             |

(Continued)



Table 3. (Continued)

| patient number | FFP in CT | therapy in CT | FFP in MRI | FFP change | therapy in CT and MRI | therapy change |
|----------------|-----------|---------------|------------|------------|-----------------------|----------------|
| 47             | II        | conservative  | IV         | yes        | operative             | yes            |
| 48             | II        | conservative  | IV         | yes        | operative             | yes            |
| 49             | II        | conservative  | IV         | yes        | conservative          | no             |
| 50             | II        | conservative  | IV         | yes        | conservative          | no             |
| 51             | III       | conservative  | III        | no         | conservative          | no             |
| 52             | III       | conservative  | IV         | yes        | operative             | yes            |
| 53             | III       | conservative  | IV         | yes        | operative             | yes            |
| 54             | III       | operative     | IV         | yes        | operative             | no             |
| 55             | III       | operative     | IV         | yes        | operative             | no             |
| 56             | III       | operative     | IV         | yes        | operative             | no             |
| 57             | IV        | operative     | IV         | no         | operative             | no             |
| 58             | IV        | operative     | IV         | no         | operative             | no             |
| 59             | IV        | operative     | IV         | no         | operative             | no             |
| 60             | IV        | operative     | IV         | no         | operative             | no             |
| 61             | IV        | operative     | IV         | no         | operative             | no             |
| 62             | IV        | operative     | IV         | no         | operative             | no             |
| 63             | IV        | operative     | IV         | no         | operative             | no             |
| 64             | IV        | operative     | IV         | no         | operative             | no             |
| 65             | IV        | operative     | IV         | no         | operative             | no             |
| 66             | IV        | operative     | IV         | no         | operative             | no             |
| 67             | IV        | operative     | IV         | no         | operative             | no             |

The therapy decision for isolated CT imaging and CT and MRI imaging is also presented.

<https://doi.org/10.1371/journal.pone.0238773.t003>

diagnosis as well as a resulting change of the therapy should be recorded. The second aim was the correlation of bone density to fracture classification.

The second outcome parameter of the study, the correlation of the Hounsfield units in the vertebral body L5 as an indicator of bone density to the fracture classification could not show any correlation in the sense of a higher classification according to Rommens and Hofmann. Only 10% of the patients showed no clear bone density reduction based on the Hounsfield

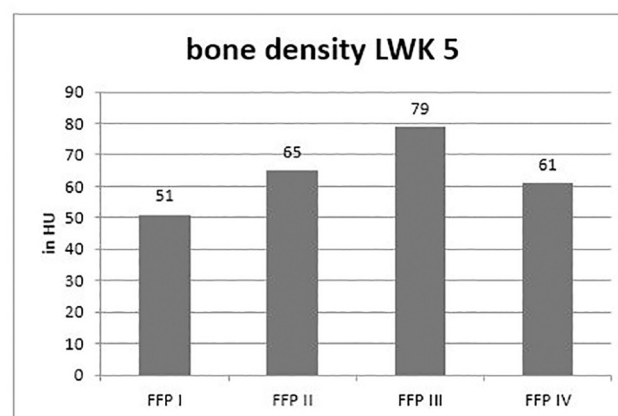

**Fig 3. Distribution of patients bone mineral density in L5 according to the fragility fracture of the pelvis classification according to Rommens in CT.**

<https://doi.org/10.1371/journal.pone.0238773.g003>



units in L 5. In 90% (n = 60/67) a reduced bone density could be measured in L5. Additive bone density measurements (DEXA or QCT) were not available. However, existing studies showed a correlation between reduced Hounsfield units and reduced bone density [8, 18]. An osteological diagnosis and possibly anti-osteoporotic therapy were indicated in surgical and conservative procedures.

The question of a quantitative regression of edema without fracture line in MRI with isolated anti-osteoporotic therapy cannot be answered on the basis of the data available.

Looking at the primary outcome parameter, fracture detection rates were statistically significant superior for MRI as compared to CT (100% MRI; 72.7% CT; p-value <0.05). The main reason for this is, the computed tomography is in terms of assessment of the posterior pelvic ring in the diagnosis of fragility fractures is limited and has its strengths in the diagnosis of the anterior pelvic ring. This led to an appreciation of the fracture classification to more severe injuries and thus to a more frequent decision on the surgical procedure. The surgical procedure was also partially influenced: Based on the therapy recommendations of Rommens et al. [19], lumbopelvic stabilization should be considered for additional transverse fracture components.

The present imaging diagnosis was examined for fracture signs. CT and MRI data were evaluated because of the FFP classification according to Rommens et al. [16].

In the present study, edema in MRI without adequate trauma was evaluated as fracture-associated bone bruise; this represents the histopathological correlate of microfractures of the cancellous bone with bleeding into the fatty bone marrow [20, 21]. In the absence of regeneration processes, the fracture becomes radiologically visible after 2–3 weeks in CT [22]. If the overload and the pathological bone metabolism can be eliminated, the development of a fracture can be avoided [23].

The question of the relevance of the additional MRI examination was assessed by investigating a change the therapy (conservative vs. surgical, or changing the surgical procedure) on the basis of findings from imaging diagnostics.

Patients with pain in a region of the pelvis without corresponding fracture detection in CT should be diagnosed by MRI or DECT. The indirect fracture signs of oedema with or without a delimitable fracture line are often visible here. Cabarrus et al. describes this in 7% of their patients [6]. With continued immobility and fracture signs visible in MRI, it remains controversial whether surgical intervention is indicated to avoid immobilization-associated complications [24, 25]. The question of a bilateral stabilization of sacrum fractures with only unilateral fractures in CT and additional contralateral edema in MRI to avoid subsequent operations by a contralateral follow-up fracture is also controversial.

It is undisputed that the decision on therapy in FFP is not only influenced by imaging, but also by mobilization and patient-specific factors such as dementia, age, concomitant diseases [25]. Nevertheless, imaging is an important influencing parameter for therapy decisions. This raises the question of whether a therapy recommendation can be made on the basis of the classification according to Rommens et al [16] In our study, 31% (21/67) patients showed a change in fracture classification, but only 10% (7/67) changed their treatment decision. The decisive factor here was therefore not the classification alone, but other factors. Since the clinical facts were not available, the localization of the additively determined edema was the main factor in the decision making process. Based on the therapy recommendations of Rommens et al. [16], lumbopelvic stabilization must be considered for additional transverse fracture components. Our data show that each FFP IV classified fracture resulted in a surgical therapy decision based only on image morphology. This was not the case in CT and MRI for the FFP IV entity classified in MRI. A decision for lumbopelvic stabilization was made to a small extent and only in the presence of a fracture line with dislocation. In our study a decision for lumbopelvic

stabilization was not made only because of the edema on MRI. The FFP classification isolated cannot be used in MRI in our study to make a decision.

Due to the lack of agreement in dealing with oedema detected in MRI with or without fracture lines without correlation in CT, an additive MRI can only be recommended to a limited extent. Further studies on the value of the isolated oedema visible on MRI are necessary to establish uniform therapeutic consequences. A limitation of the study is the sample considered to be not representative of the underlying overall population in a clinical practice setting. Different devices were used, so that there was no uniform protocol for retrospective analysis.

The FFP classification is defined by the CT and the presence of edema in the MRI has not yet been taken into account. However, our interpretation of the classification in MRI is based on the proof of edema, so that it is necessary to critically question the disease value of the edema. However, we would like to encourage discussion as to whether it would not make sense to supplement the FFP classification in the sense of modifiers with additional edema detection. This aspect would require further research.

Whether the results of the MRI really only resulted in a change of the therapy regime in 10% ( $n = 7/67$ ) cannot be answered retrospectively, since no documentation was available as to which operative planning was previously available.

In the case of a one-sided fracture of the sacrum, prophylactically stabilizing the opposite side with, for example, transiliosacral fixator internal, "sacral bar" or transiliosacral screw osteosynthesis remains controversial within the participating clinics. An evaluation of the therapy change from one-sided to bilateral stabilization of the sacrum is not possible in this study, but would be desirable for future studies.

For the clinical practice we recommend rapid MRI diagnostics for old patients without trauma or with inadequate trauma and pain in the pelvis, in order to correctly diagnose the extent of the fracture and to have prompt therapy without long immobilization times for the patient.

## Summary and conclusion

Study results suggest that MRI can detect a significantly higher number of FFPs as compared to conventional CT. In addition, fractures were classified into more severe injuries, which led to a more frequent surgical procedure. The evaluation of bone marrow changes by MRI or Dual Source CT is therefore recommended for early treatment decisions and operative planning.

## Acknowledgments

The authors thank the Pelvic Injury Register of the German Trauma Society for support. We acknowledge support by the German Research Foundation and the Open Access Publication Fund of the Thueringer Universitaets- und Landesbibliothek Jena Projekt-Nr. 433052568.

## Author Contributions

**Conceptualization:** Isabel Graul, Ivan Marintshev, Carsten Hackenbroch, Patricia Lang.

**Formal analysis:** Patricia Lang.

**Investigation:** Isabel Graul.

**Methodology:** Isabel Graul, Carsten Hackenbroch.

**Validation:** Ivan Marintshev, Hans-Georg Palm.

**Writing – original draft:** Isabel Graul, Patricia Lang.

**Writing – review & editing:** Ivan Marintshev, Hans-Georg Palm, Benedikt Friemert.

## References

1. Hopf JC, Krieglstein CF, Muller LP, Koslowsky TC. Percutaneous iliosacral screw fixation after osteoporotic posterior ring fractures of the pelvis reduces pain significantly in elderly patients. *Injury*. 2015; 46(8):1631–6. <https://doi.org/10.1016/j.injury.2015.04.036> PMID: 26052052
2. Arduini M, Saturnino L, Piperno A, Iundusi R, Tarantino U. Fragility fractures of the pelvis: treatment and preliminary results. *Aging Clin Exp Res*. 2015; 27 Suppl 1:S61–7.
3. Marrinan S, Pearce MS, Jiang XY, Waters S, Shanshal Y. Admission for osteoporotic pelvic fractures and predictors of length of hospital stay, mortality and loss of independence. *Age and ageing*. 2015; 44(2):258–61. <https://doi.org/10.1093/ageing/afu123> PMID: 25365963
4. Lassus J, Tulikoura I, Kontinen YT, Salo J, Santavirta S. Bone stress injuries of the lower extremity: a review. *Acta orthopaedica Scandinavica*. 2002; 73(3):359–68. <https://doi.org/10.1080/000164702320155392> PMID: 12143987
5. Lyders EM, Whitlow CT, Baker MD, Morris PP. Imaging and treatment of sacral insufficiency fractures. *AJNR American journal of neuroradiology*. 2010; 31(2):201–10. <https://doi.org/10.3174/ajnr.A1666> PMID: 19762463
6. Cabarrus MC, Ambekar A, Lu Y, Link TM. MRI and CT of insufficiency fractures of the pelvis and the proximal femur. *AJR Am J Roentgenol*. 2008; 191(4):995–1001. <https://doi.org/10.2214/AJR.07.3714> PMID: 18806133
7. Graul I, Vogt S, Strube P, Hölzl A. Significance of Lumbar MRI in Diagnosis of Sacral Insufficiency Fracture. *Global spine journal*. 2020:2192568220941821.
8. Nuchtern JV, Hartel MJ, Henes FO, Groth M, Jauch SY, Haegele J, et al. Significance of clinical examination, CT and MRI scan in the diagnosis of posterior pelvic ring fractures. *Injury*. 2015; 46(2):315–9. <https://doi.org/10.1016/j.injury.2014.10.050> PMID: 25527459
9. Henes FO, Nuchtern JV, Groth M, Habermann CR, Regier M, Rueger JM, et al. Comparison of diagnostic accuracy of Magnetic Resonance Imaging and Multidetector Computed Tomography in the detection of pelvic fractures. *Eur J Radiol*. 2012; 81(9):2337–42. <https://doi.org/10.1016/j.ejrad.2011.07.012> PMID: 21924851
10. Pulley BR, Cotman SB, Fowler TT. Surgical Fixation of Geriatric Sacral U-Type Insufficiency Fractures: A Retrospective Analysis. *Journal of orthopaedic trauma*. 2018; 32(12):617–22. <https://doi.org/10.1097/BOT.0000000000001308> PMID: 30211791
11. Kanis JA. Assessment of fracture risk and its application to screening for postmenopausal osteoporosis: synopsis of a WHO report. WHO Study Group. *Osteoporosis international: a journal established as result of cooperation between the European Foundation for Osteoporosis and the National Osteoporosis Foundation of the USA*. 1994; 4(6):368–81.
12. Pickhardt PJ, Pooler BD, Lauder T, del Rio AM, Bruce RJ, Binkley N. Opportunistic screening for osteoporosis using abdominal computed tomography scans obtained for other indications. *Ann Intern Med*. 2013; 158(8):588–95. <https://doi.org/10.7326/0003-4819-158-8-201304160-00003> PMID: 23588747
13. Level 3 guideline on the treatment of patients with severe/multiple injuries: AWMF Register-Nr. 012/019. *Eur J Trauma Emerg Surg*. 2018; 44(Suppl 1):3–271. <https://doi.org/10.1007/s00068-018-0922-y> PMID: 29654333
14. Hackenbroch C, Riesner HJ, Lang P, Stuby F, Danz B, Friemert B, et al. Dual Energy CT—a Novel Technique for Diagnostic Testing of Fragility Fractures of the Pelvis. *Zeitschrift für Orthopädie und Unfallchirurgie*. 2017; 155(1):27–34. <https://doi.org/10.1055/s-0042-110208> PMID: 28249339
15. Hackenbroch C, Riesner HJ, Lang P, Stuby F, Beer M, Friemert B, et al. Dual Energy Computed Tomography in Musculoskeletal Imaging, with Focus on Fragility Fractures of the Pelvis. *Zeitschrift für Orthopädie und Unfallchirurgie*. 2017; 155(6):708–15. <https://doi.org/10.1055/s-0043-117738> PMID: 29241277
16. Rommens PM, Hofmann A. Comprehensive classification of fragility fractures of the pelvic ring: Recommendations for surgical treatment. *Injury*. 2013; 44(12):1733–44. <https://doi.org/10.1016/j.injury.2013.06.023> PMID: 23871193
17. Wagner D, Hofmann A, Kamer L, Sawaguchi T, Richards RG, Noser H, et al. Fragility fractures of the sacrum occur in elderly patients with severe loss of sacral bone mass. *Archives of orthopaedic and trauma surgery*. 2018.

18. Scheyerer MJ, Ullrich B, Osterhoff G, Spiegl UA, Schnake KJ. [Hounsfield units as a measure of bone density-applications in spine surgery]. *Unfallchirurg*. 2019.
19. Rommens PM, Wagner D, Hofmann A. Fragility Fractures of the Pelvis. *JBJS Rev*. 2017; 5(3).
20. Thiryayi WA, Thiryayi SA, Freemont AJ. Histopathological perspective on bone marrow oedema, reactive bone change and haemorrhage. *Eur J Radiol*. 2008; 67(1):62–7. <https://doi.org/10.1016/j.ejrad.2008.01.056> PMID: 18337044
21. Rangger C, Kathrein A, Freund MC, Klestil T, Kreczy A. Bone bruise of the knee: histology and cryosections in 5 cases. *Acta orthopaedica Scandinavica*. 1998; 69(3):291–4. <https://doi.org/10.3109/17453679809000933> PMID: 9703406
22. Tins BJ, Garton M, Cassar-Pullicino VN, Tyrrell PN, Lalam R, Singh J. Stress fracture of the pelvis and lower limbs including atypical femoral fractures-a review. *Insights Imaging*. 2015; 6(1):97–110. <https://doi.org/10.1007/s13244-014-0371-z> PMID: 25448537
23. Spiegl UJA, Schnake KJ, Osterhoff G, Scheyerer MJ, Ullrich B, Bula P, et al. Imaging of Sacral Stress and Insufficiency Fractures. *Zeitschrift fur Orthopadie und Unfallchirurgie*. 2019; 157(2):144–53. <https://doi.org/10.1055/a-0640-8933> PMID: 30053762
24. Taillandier J, Langue F, Alemanni M, Taillandier-Heriche E. Mortality and functional outcomes of pelvic insufficiency fractures in older patients. *Joint Bone Spine*. 2003; 70(4):287–9. [https://doi.org/10.1016/s1297-319x\(03\)00015-0](https://doi.org/10.1016/s1297-319x(03)00015-0) PMID: 12951312
25. Hoch A, Pieroh P, Gras F, Hohmann T, Mardian S, Holmenschlager F, et al. Age and "general health"-beside fracture classification-affect the therapeutic decision for geriatric pelvic ring fractures: a German pelvic injury register study. *Int Orthop*. 2019.
